# Supplementary material for: The influence of magnesium and manganese cations on the chemical and bioactive properties of purple and green basil
Source: Royal Society of Chemistry journal article supplement (doi:10.1039/d4fo02820a), 2024-01-01
Supplement: d4fo02820a1.pdf [file d4fo02820a1.pdf]

## 1 SUPPLEMENTARY MATERIAL

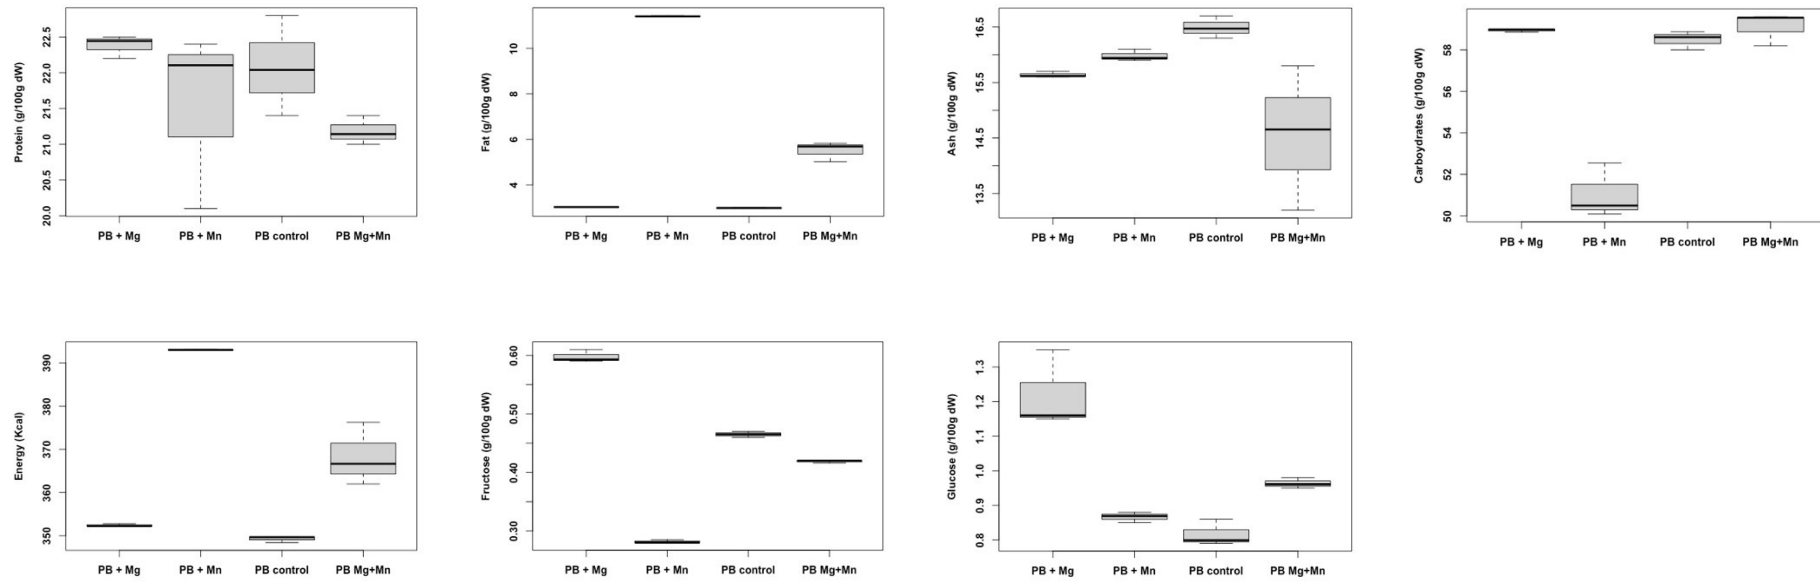

2 **Figure S1** . Centesimal composition and soluble sugars expressed in g/100g dw for purple basil-PB (*Ocimum basilicum purpurascens*).

3  
4  
5  
6

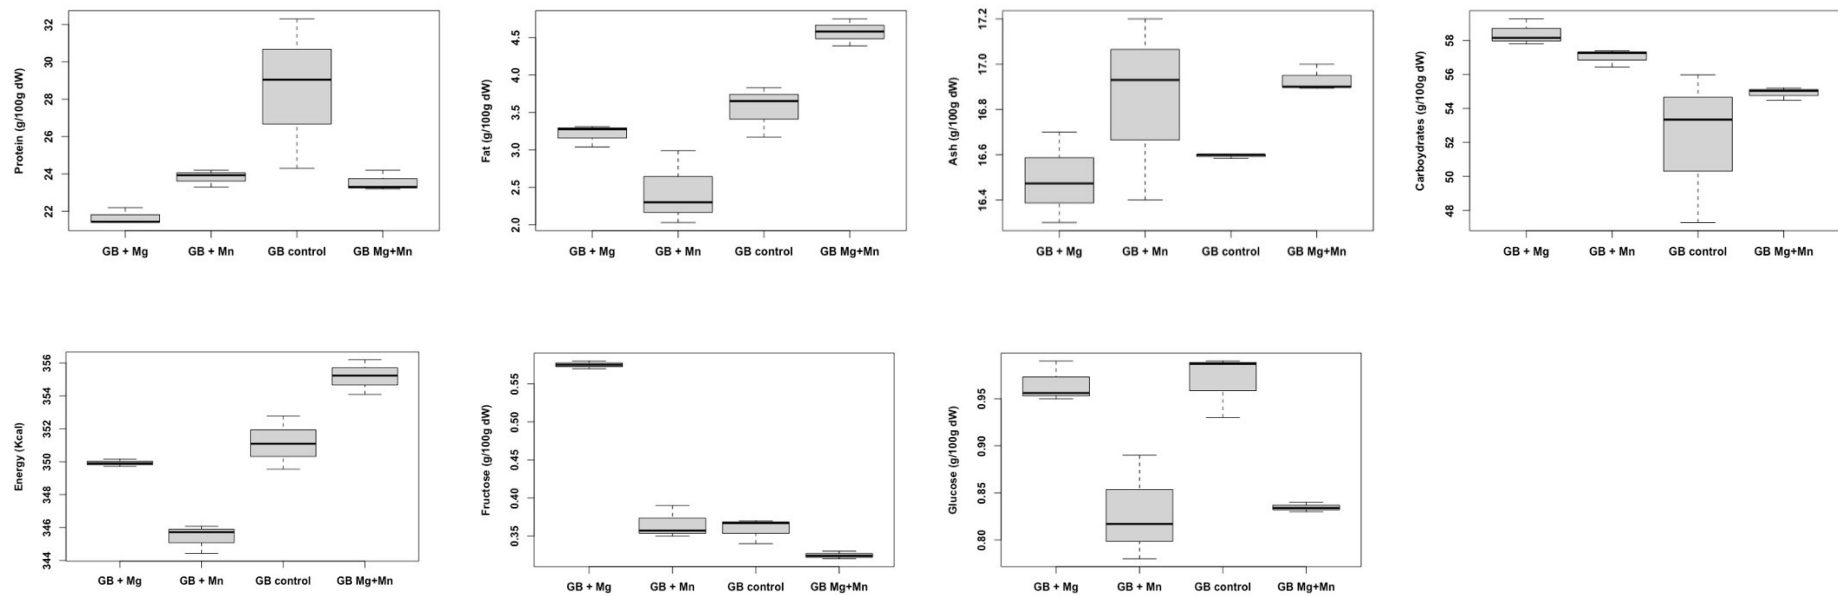

**Figure S2.** Centesimal composition and soluble sugars expressed in g/100g dw for green basil-GB (*Ocimum basilicum*).

7  
8  
9  
10  
11  
12  
13

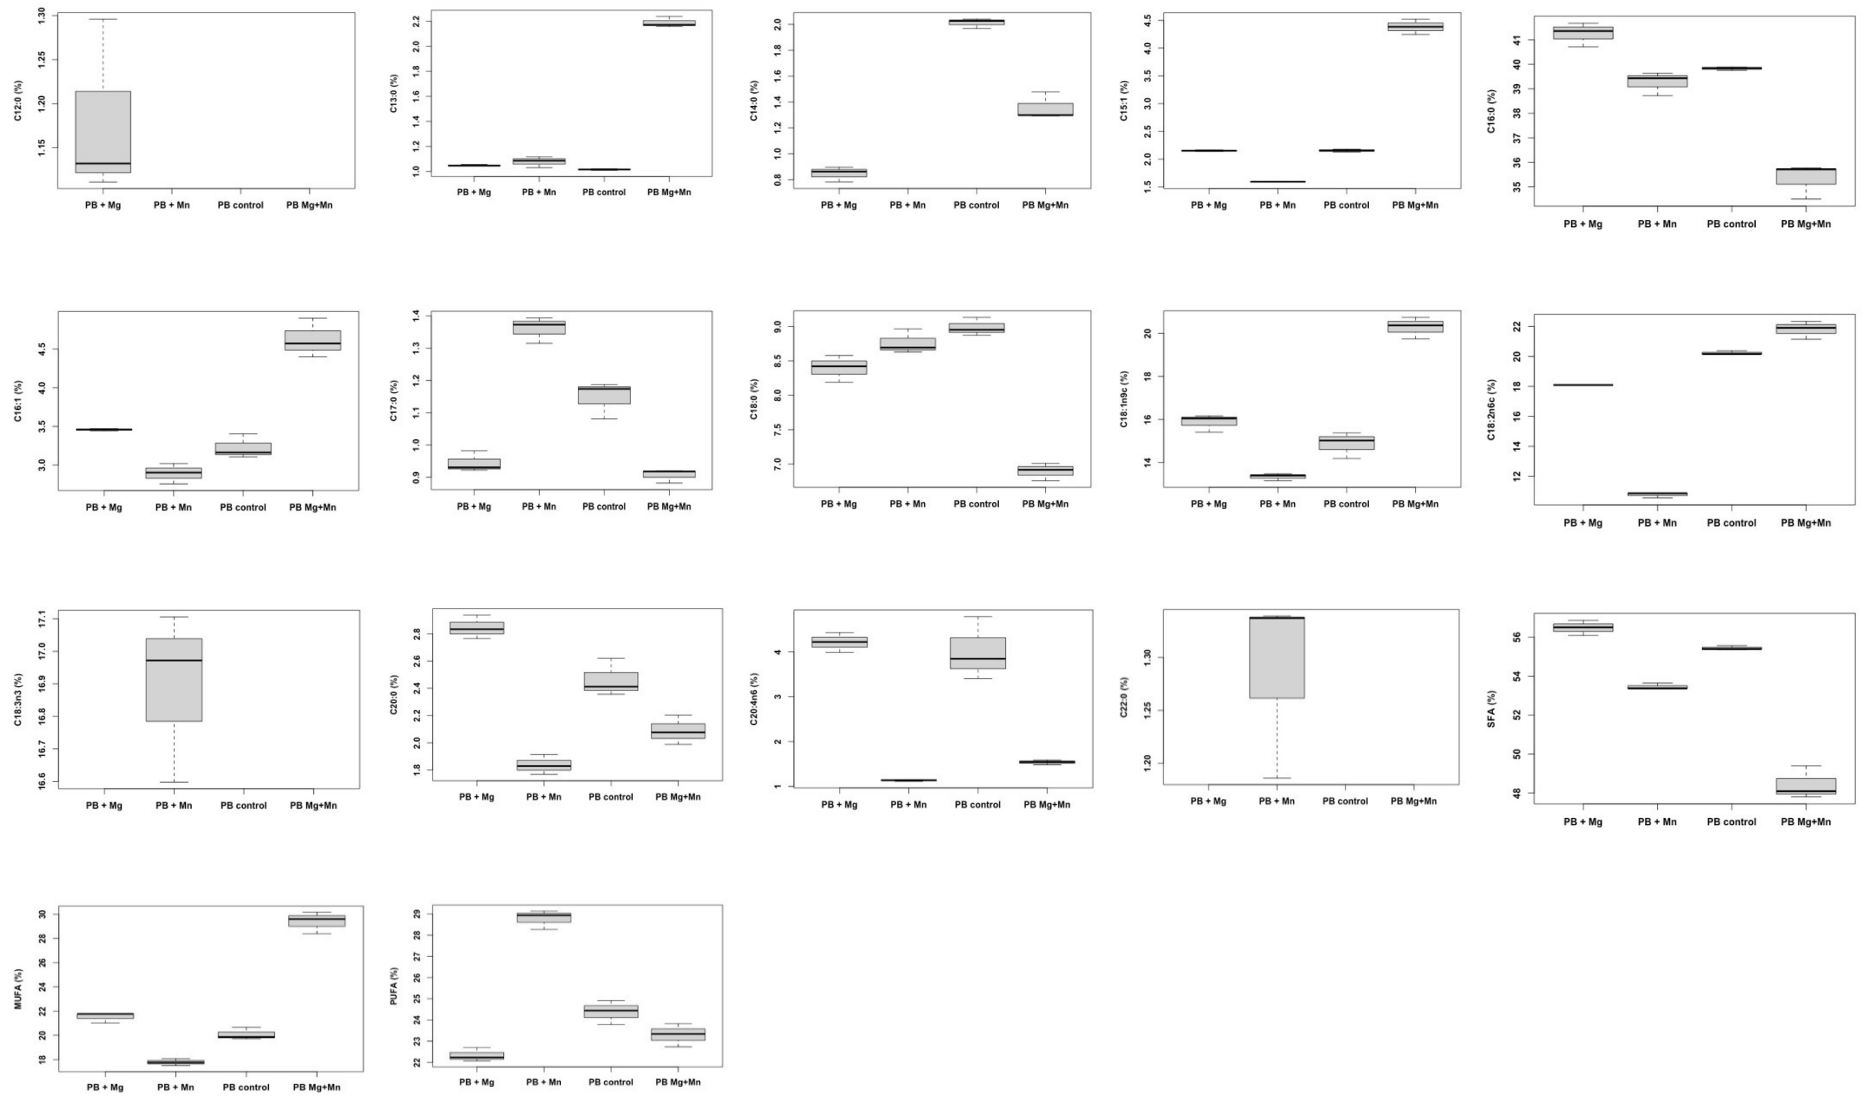

14 **Figure S3.** Profile in individual fatty acids for purple basil-PB (*Ocimum basilicum purpurascens*) (%).

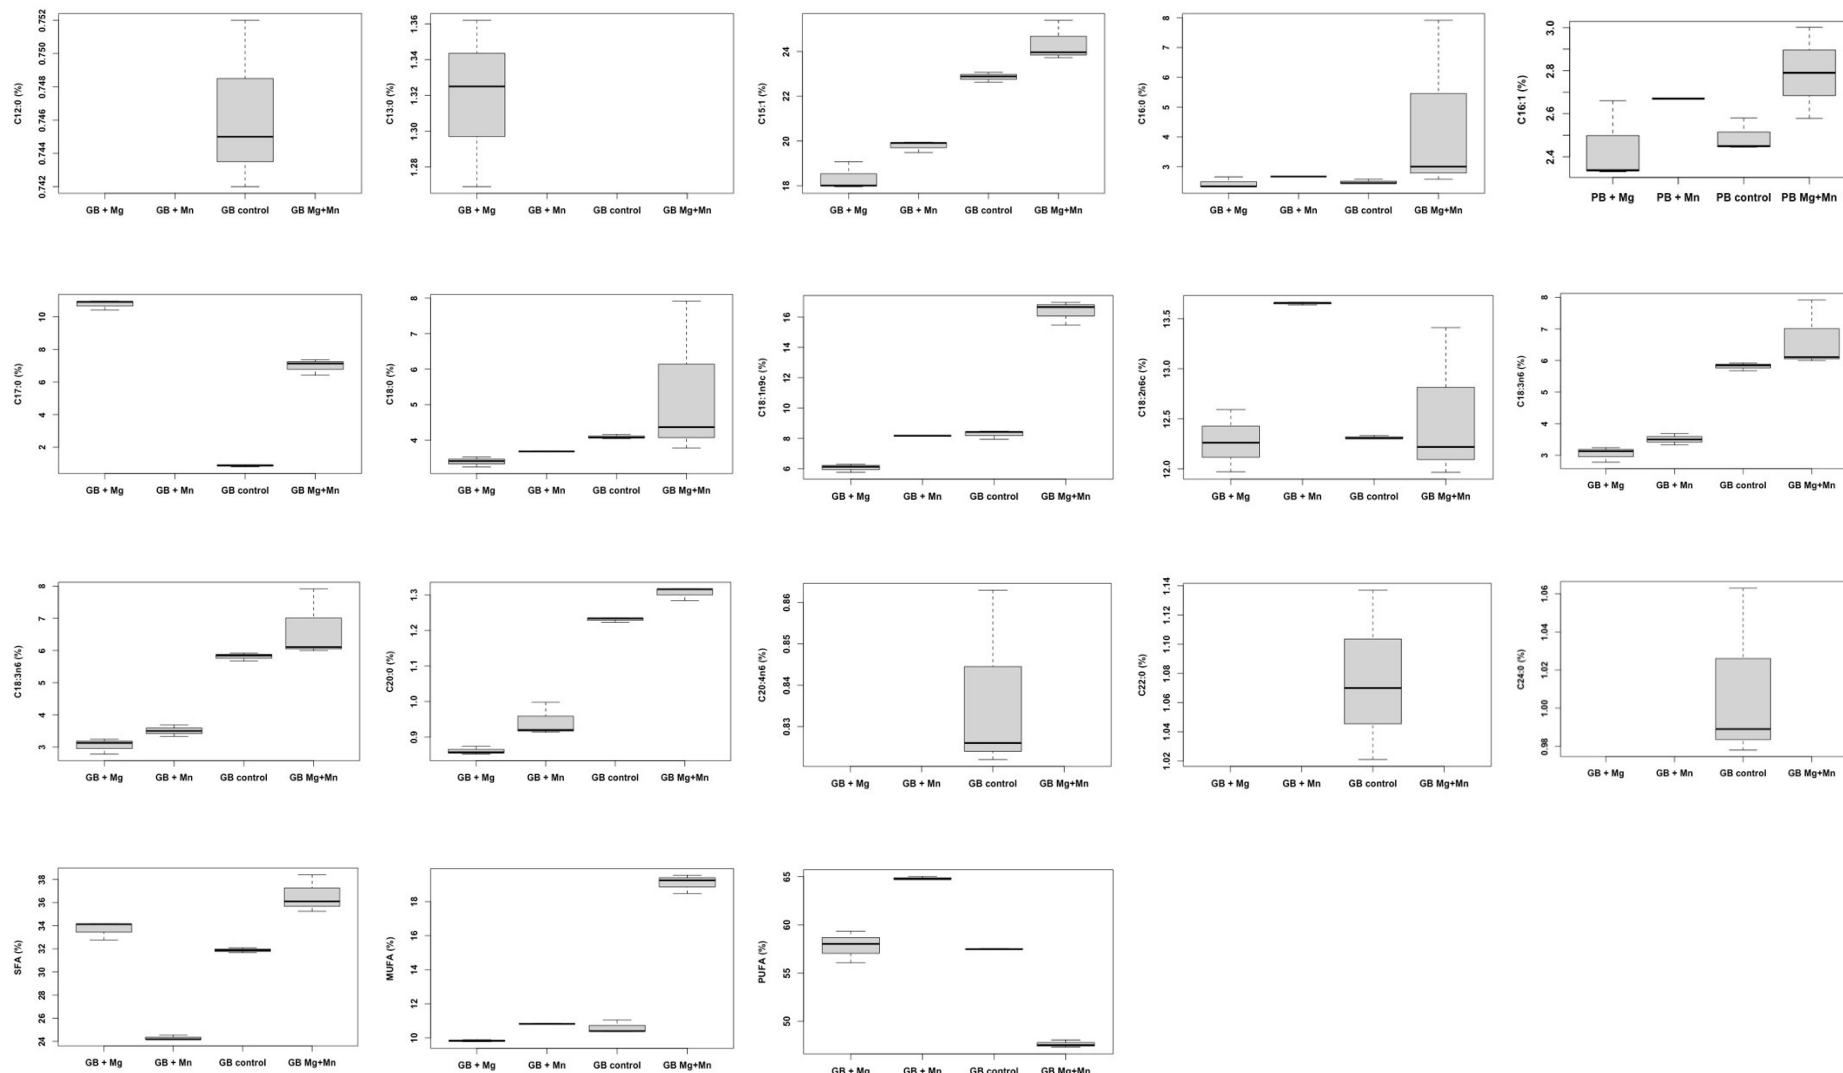

15 **Figure S4.** Profile in individual fatty acids for green basil-GB (*Ocimum basilicum*) (%).

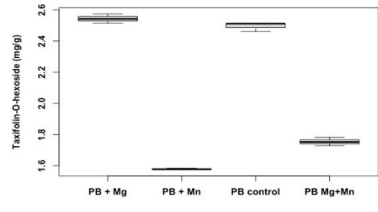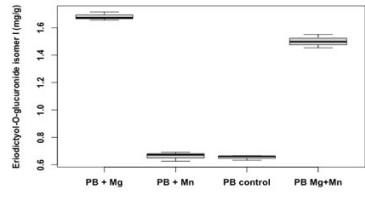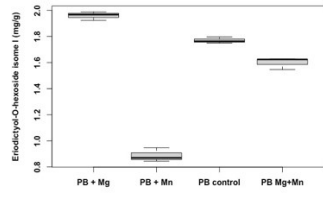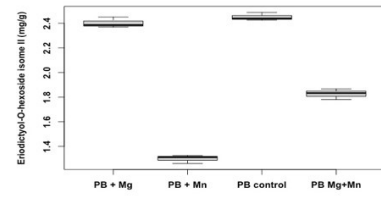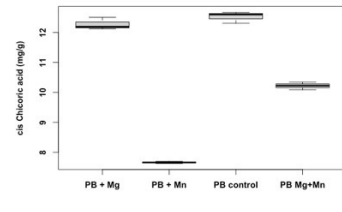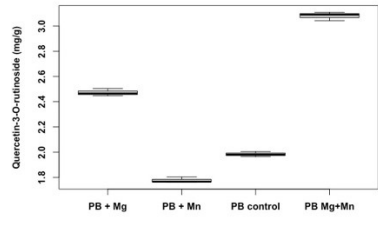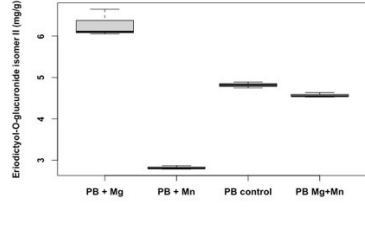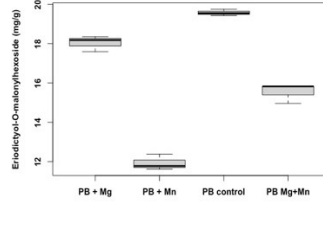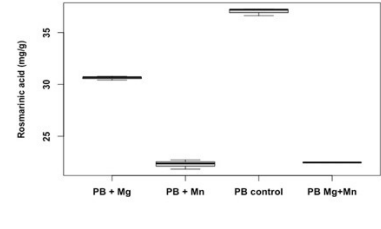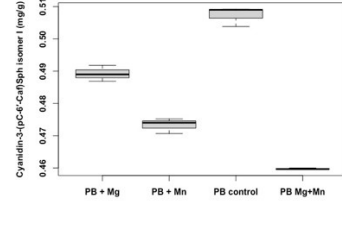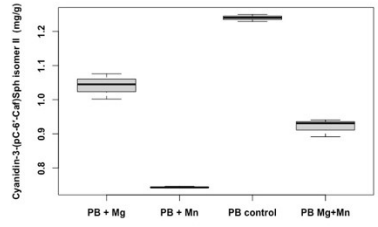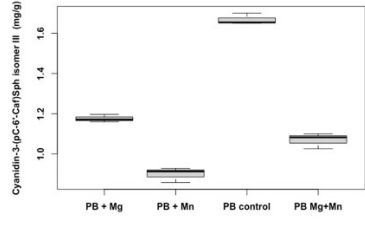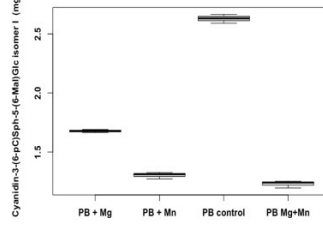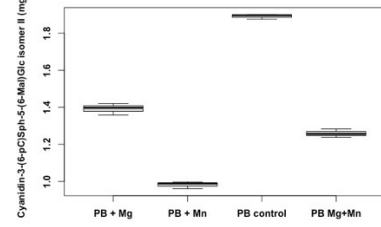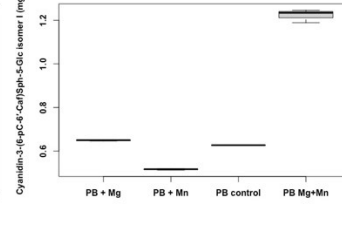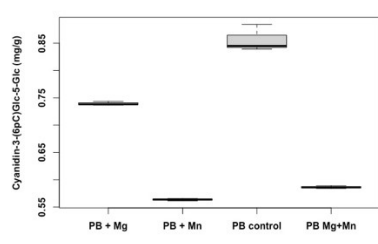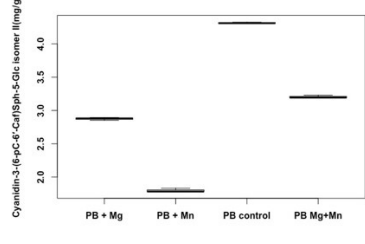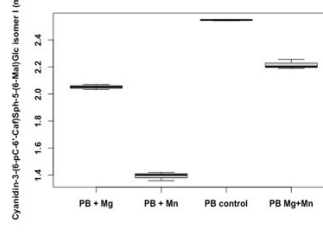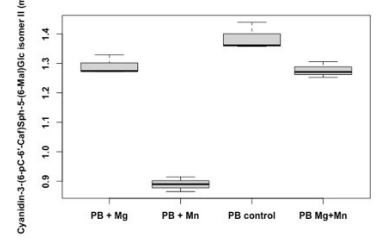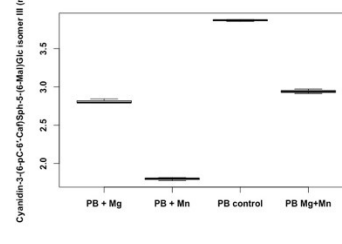

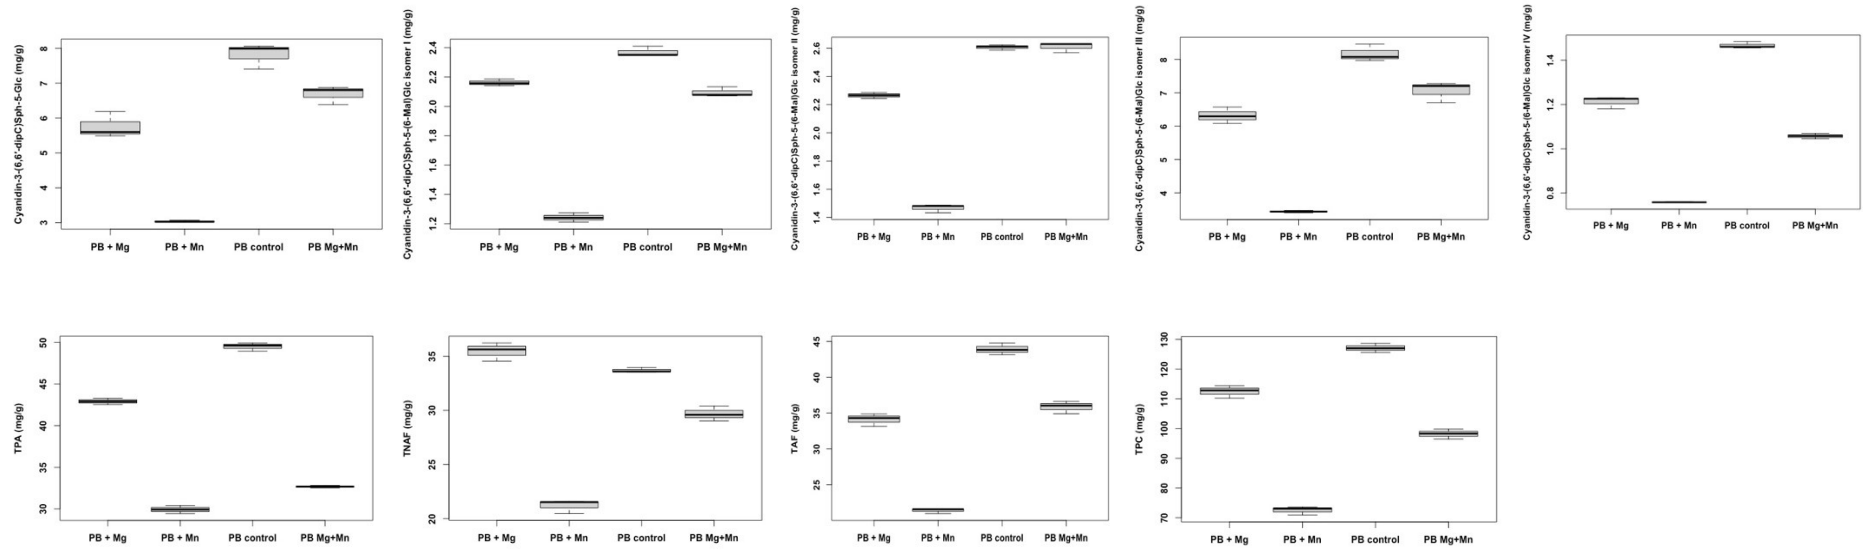

16 **Figure S5.** Total phenolic compounds purple basil-PB (*Ocimum basilicum purpurascens*) (mg/g).

17  
18  
19  
20  
21  
22  
23

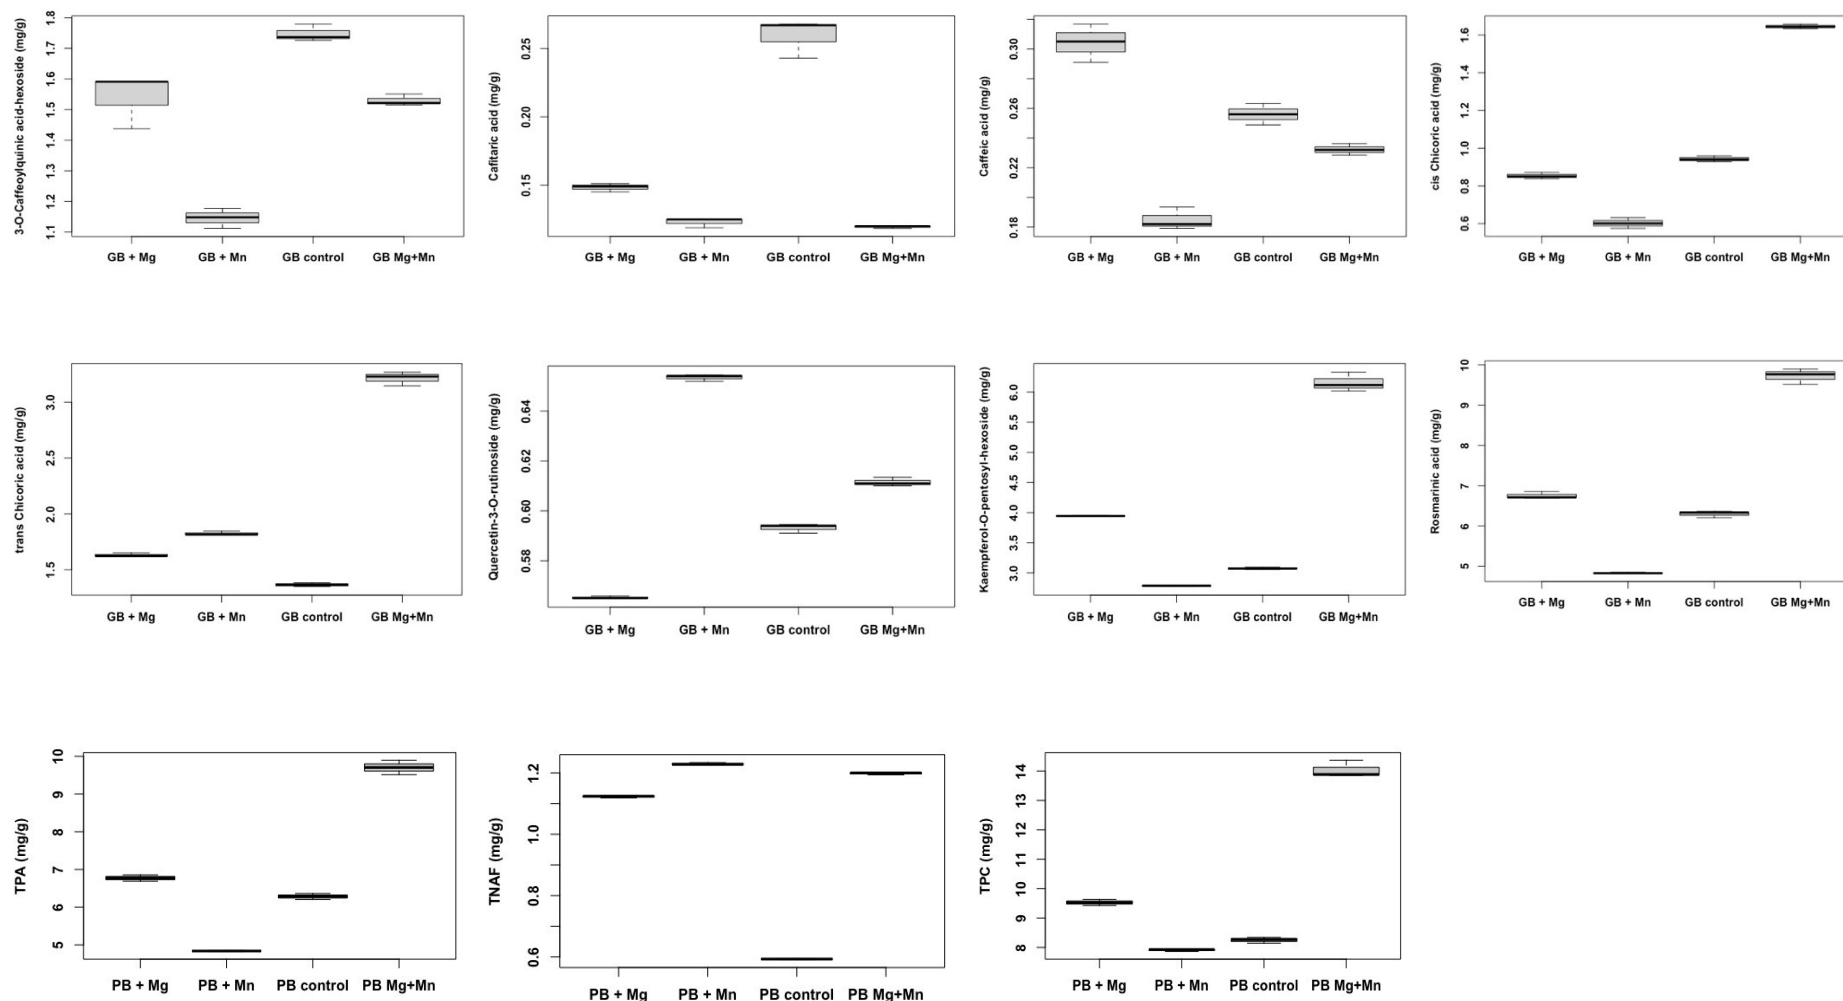

24 **Figure S6.** Total phenolic compounds green basil-GB (*Ocimum basilicum*) (mg/g).

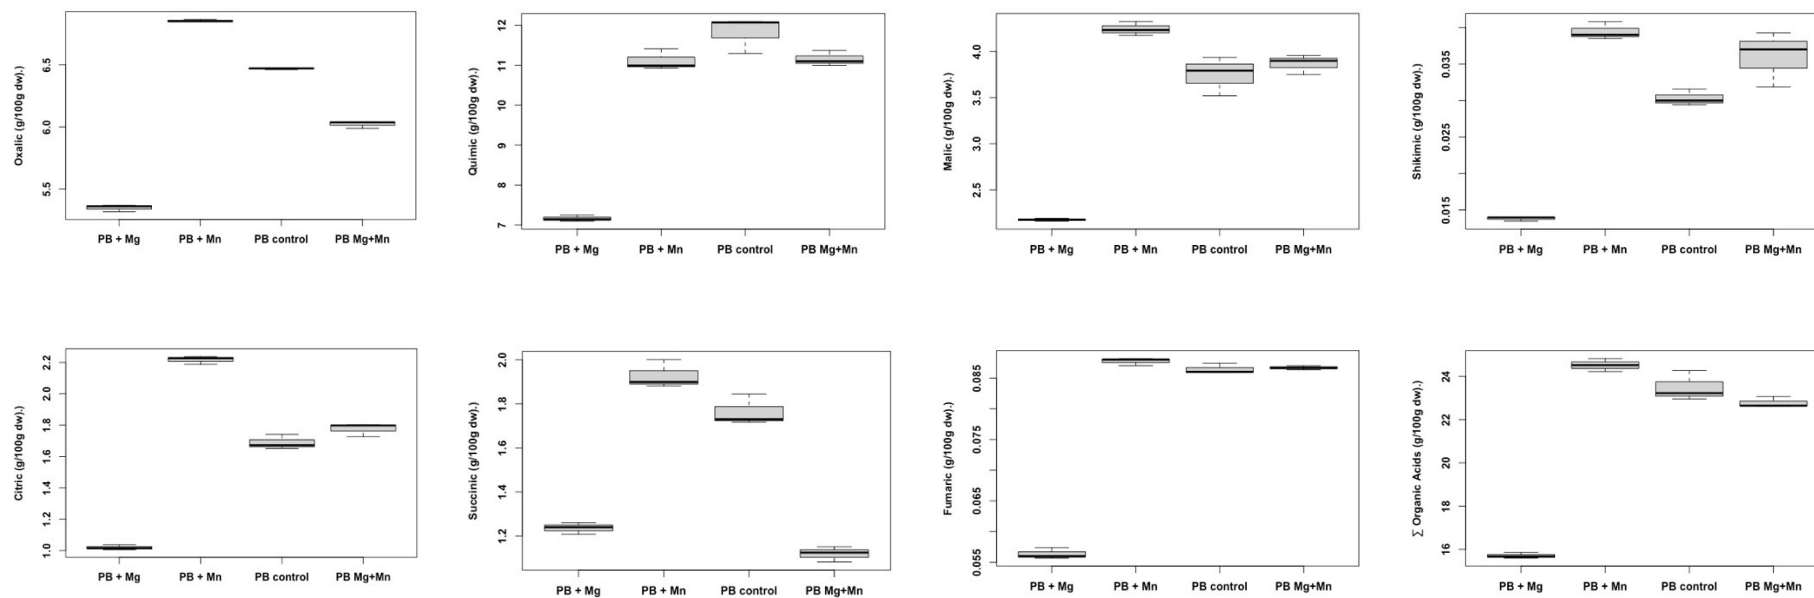

27 **Figure S7.** Profile of organic acids for purple basil-PB (*Ocimum basilicum purpurascens*) (g/100g dw).

28

29

30

31



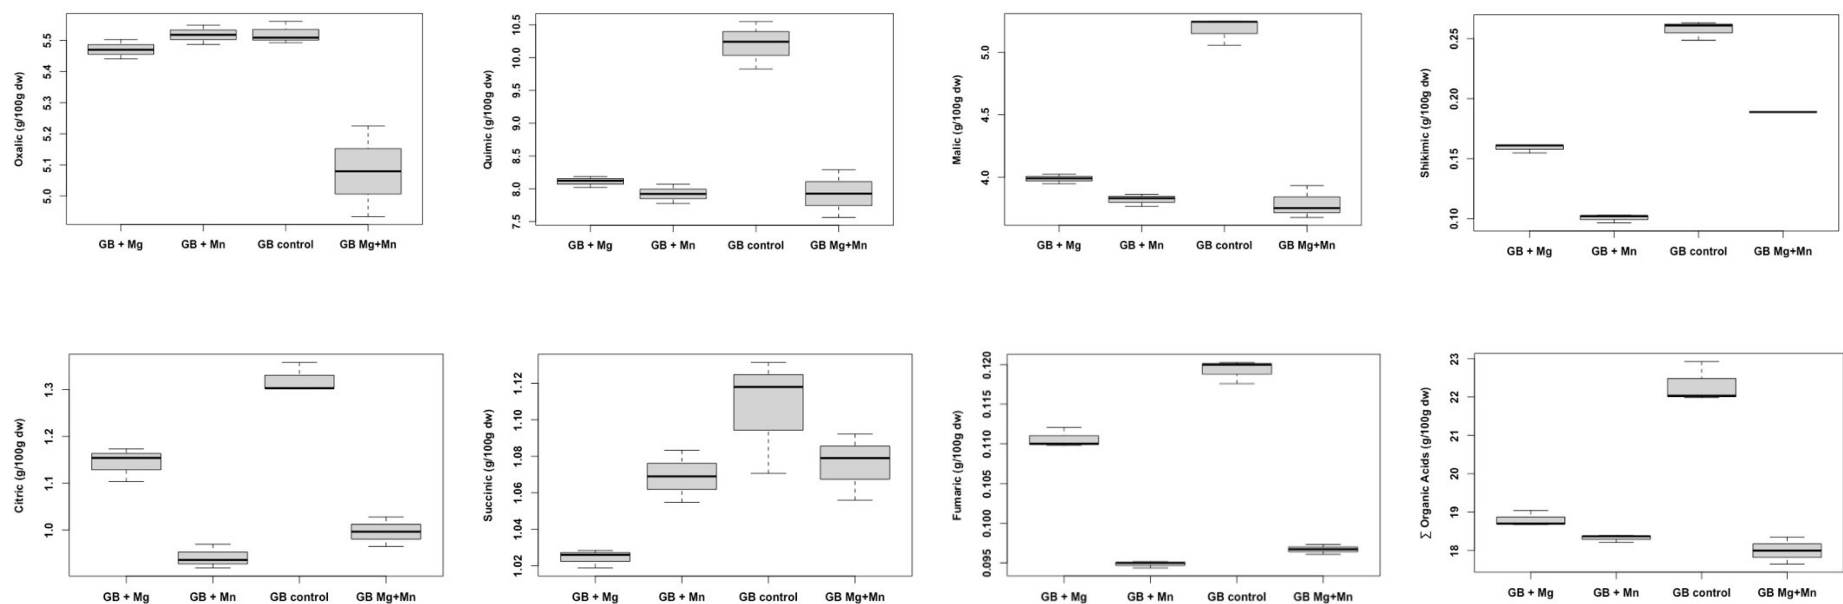

32 **Figure S8.** Profile of organic acids for green basil-GB (*Ocimum basilicum*) (g/100g dw).

33  
34  
35  
36

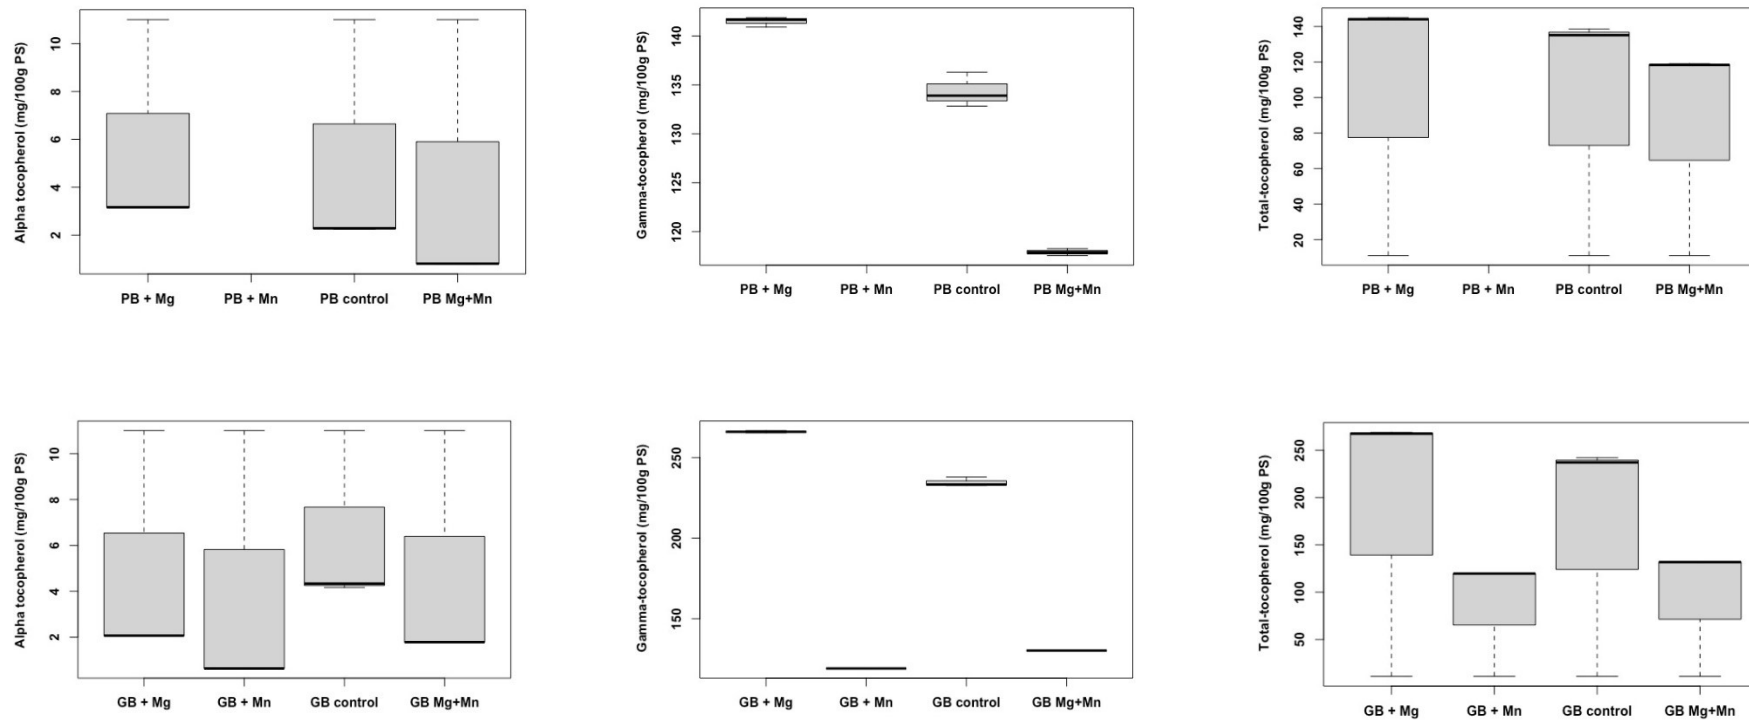

37 **Figure S9.** Tocopherol compounds expressed mg/100g fw for purple basil-PB (*Ocimum basilicum purpurascens*) and green basil-GB (*Ocimum*  
 38 *basilicum*).

39

40

41

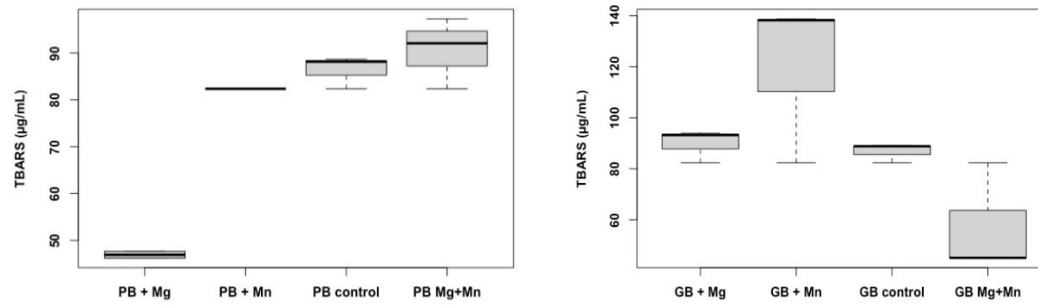

42 **Figure S10.** Antioxidant activity for TBARS GI<sub>50</sub> Values (µg/mL) and CAA% inhibition at maximum tested concentration of 2000 µM for purple  
 43 basil-PB and green basil-GB.  
 44  
 45

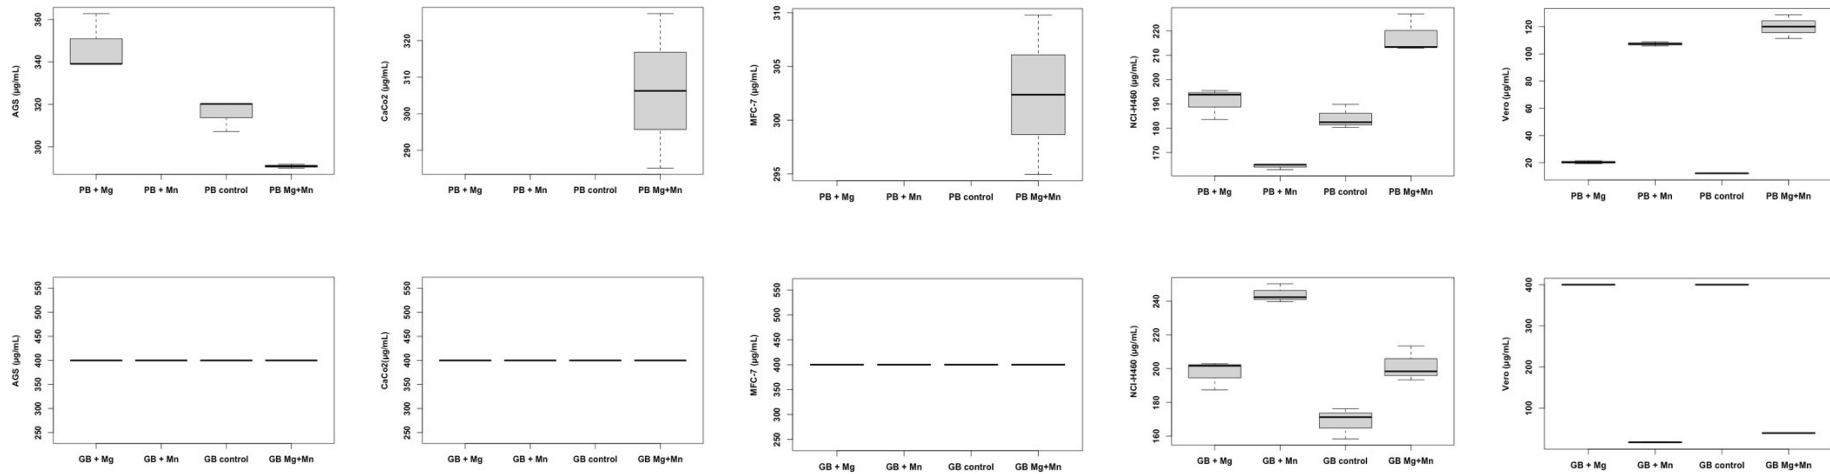

46 **Figure S11.** Cytotoxicity properties for purple basil-PB and green basil-GB GI<sub>50</sub> Values (µg/mL).  
 47  
 48

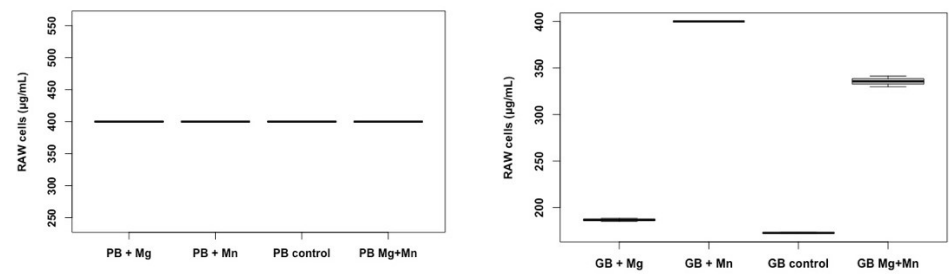

49 **Figure S12.** Anti-inflammatory properties for purple basil-PB and green basil-GB GI<sub>50</sub> Values (µg/mL).

50

51

52
